# Supplementary material for: MALDI imaging mass spectrometry revealed atropine distribution in the ocular tissues and its transit from anterior to posterior regions in the whole-eye of rabbit after topical administration
Source: PLoS One. 2019 Jan 25;14(1):e0211376. doi: 10.1371/journal.pone.0211376 (PMC6347209; doi:10.1371/journal.pone.0211376)
Supplement: S1 File — (XLSX) [file pone.0211376.s002.xlsx]

## Sheet: Line scan data
Distance from the centre	ROI (Inferior)	Number of Laser spot	Mean intensity (count)	Standard error	Standard deviation		ROI (Superior)	Number of Laser spot	Mean intensity (count)	Standard error	Standard deviation	Mann-Whitney U-test	P
400	ROI2	9	1.46512e+06	233640	700921		ROI64	10	921944	136710	432315	0.05 < P < 0.10
800	ROI3	9	1.06481e+06	201568	604704		ROI65	8	744557	69607.1	196878	P > 0.10
1200	ROI4	11	1.34183e+06	183863	609804		ROI66	8	643764	83981.9	237537	0.01 < P < 0.02	*
1600	ROI5	10	1.46712e+06	209393	662158		ROI67	10	668292	81969.5	259210	P < 0.01	**
2000	ROI6	9	1.00362e+06	180194	540583		ROI68	9	757603	139304	417911	P > 0.10
2400	ROI7	9	1.15757e+06	151774	455321		ROI69	9	894129	174347	523042	P > 0.10
2800	ROI8	10	884105	109993	347827		ROI70	9	853328	153341	460023	P > 0.10
3200	ROI9	9	772667	115165	345494		ROI71	10	716283	127772	404051	P > 0.10
3600	ROI10	11	533463	79568.9	263900		ROI72	9	959040	185439	556318	0.05 < P < 0.10
4000	ROI11	10	434286	80365.9	254139		ROI73	9	979788	157220	471661	0.02 < P < 0.05	†
4400	ROI12	9	443771	82530.3	247591		ROI74	7	861114	83947.4	222104	P < 0.01	††
4800	ROI13	8	426194	79711.6	225458		ROI75	6	775940	96170.8	235569	0.01 < P < 0.02	†
5200	ROI14	9	359626	58065.1	174195		ROI76	7	551988	63495.3	167993	0.05 < P < 0.10
5600	ROI15	9	367113	59380.3	178141		ROI77	9	400850	57239.5	171718	P > 0.10
6000	ROI16	9	272455	40816.8	122450		ROI78	10	282375	35092.1	110971	P > 0.10
6400	ROI17	7	262004	48331.7	127874		ROI79	7	247568	47011.2	124380	P > 0.10
6800	ROI18	9	234391	35320.2	105961		ROI80	8	238452	24610	69607.6	P > 0.10
7200	ROI19	7	296335	30180.1	79849		ROI81	8	205142	32072.8	90715.5	0.05 < P < 0.10
7600	ROI20	5	247871	30234.2	67605.8		ROI82	9	171948	13158.8	39476.5	0.05 < P < 0.10
8000	ROI21	8	153351	7262.94	20542.7		ROI83	8	150103	13945.6	39444	P > 0.10
8400	ROI22	6	128895	7641.56	18717.9		ROI84	6	142004	11267	27598.3	P > 0.10
8800	ROI23	8	114199	4322.61	12226.2		ROI85	8	135280	9058.3	25620.7	0.05 < P < 0.10
9200	ROI24	10	128437	5693.54	18004.5		ROI86	8	130985	3354.35	9487.52	P > 0.10
9600	ROI25	10	117747	8727.88	27600		ROI87	8	90281.8	6939.95	19629.1	P > 0.10
10000	ROI26	10	113078	7628.73	24124.2		ROI88	9	68084.6	4243.37	12730.1	P < 0.01	**
10400	ROI27	8	153529	9153.8	25890.8		ROI89	8	59434.1	3745.86	10594.9	P < 0.01	**
10800	ROI28	7	165194	11478.6	30369.5		ROI90	7	54677	14190.4	37544.3	P < 0.01	**
11200	ROI29	8	134515	19522	55216.5		ROI91	6	16758.6	4081.94	1666.44	P < 0.01	**
11600	ROI30	5	86317.1	23677.1	52943.7		ROI92	4	20457.5	1982.38	3964.77	0.05 < P < 0.10
12000	ROI31	3	43302.6	18529.1	32093.3		ROI93	5	13997.4	2111.37	4721.17	P > 0.10
12400	ROI32	3	15278.4	5793.61	10034.8		ROI94	4	10793.6	844.134	1688.27	P > 0.10
12800	ROI33	4	9207.63	1282.4	2564.8		ROI95	4	22125	5522.79	11045.6	0.02 < P < 0.05	†
13200	ROI34	6	4881.54	1173.51	2874.51		ROI96	7	23510.7	5685.82	15043.3	P < 0.01	††
13600	ROI35	6	3950.65	848.268	2077.82		ROI97	4	28583.7	2454.69	4909.39	P < 0.01	††
14000	ROI36	4	5515.41	1909.52	3819.04		ROI98	7	18248.8	7979.5	21111.8	P > 0.10
14400	ROI37	5	4187.59	667.508	1492.59		ROI99	5	2382.77	845.971	1891.65	P > 0.10
14800	ROI38	4	4365.92	392.339	784.679		ROI100	5	916.018	463.801	1037.09	0.01 < P < 0.05	*
15200	ROI39	5	5518.59	1413.71	3161.15		ROI101	5	1833.67	297.936	666.205	0.01 < P < 0.02	*
15600	ROI40	4	6189.8	990.782	1981.56		ROI102	6	692.867	447.479	1096.1	P < 0.01	**
16000	ROI41	3	4003.46	1967.89	3408.49		ROI103	7	1894.95	246.131	651.2	P > 0.10
16400	ROI42	5	2562.37	630.939	1410.82		ROI104	7	2641.35	254.578	673.549	P > 0.10
16800	ROI43	3	2437.52	777.957	1347.46		ROI105	6	2788.72	424.664	1040.21	P > 0.10
17200	ROI44	3	2824.59	1579.27	2735.38		ROI106	5	1954.44	686.45	1534.95	P > 0.05
17600	ROI45	3	2359.84	716.867	1241.65		ROI107	4	3481.83	982.571	1965.14	P > 0.10
18000	ROI46	5	1960.98	874.468	1955.37		ROI108	5	3134.66	997.646	2230.8	P > 0.05
18400	ROI47	3	3420.3	1408.71	2439.96		ROI109	4	1596.54	569.814	1139.63	P > 0.10
18800	ROI48	4	3016.57	1338.04	2676.07		ROI110	4	2052.7	375.726	751.452	P > 0.10
19200	ROI49	3	4381.66	797.385	1381.11		ROI111	4	1261.51	782.595	1565.19	P > 0.05
19600	ROI50	5	2911.05	411.902	921.041		ROI112	4	1224.17	529.943	1059.89	0.05 < P < 0.10
20000	ROI51	4	3620.07	456.599	913.198		ROI113	3	770.739	433.027	750.025	0.05 < P < 0.10
20400	ROI52	3	2785.09	1468.31	2543.19		ROI114	3	1635.02	819.414	1419.27	P > 0.05
20800	ROI53	4	3992.45	474.511	949.022		ROI115	4	783.525	783.525	1567.05	0.01 < P < 0.05	*
21200	ROI54	4	3530.12	1162.95	2325.89		ROI116	3	0	0	0	0.01 < P < 0.05	*
21600	ROI55	4	3913.3	1017.44	2034.87		ROI117	5	1105.65	1105.65	2472.32	P > 0.05
22000	ROI56	5	4136.94	1224.49	2738.04		ROI118	3	4025.52	1370.51	2373.79	P > 0.10
22400	ROI57	5	5594.73	927.007	2072.85		ROI119	4	3817.96	1930.16	3860.32	P > 0.10
22800	ROI58	5	4537.34	1842.08	4119.02		ROI120	2	1691.12	253.476	358.469	P > 0.10
23200	ROI59	3	4536.88	1587.17	2749.06		ROI121	5	4914.8	838.524	1875	P > 0.10
23600	ROI60	5	4813.48	1183.08	2645.46		ROI122	4	1211.4	763.163	1526.33	0.01 < P < 0.05	*
24000	ROI61	3	5308.48	1344.93	2329.48		ROI123	3	3381.65	1021.43	1769.16	P > 0.10
24400	ROI62	7	4444.74	956.993	2531.97		ROI124	4	4068.59	1780.65	3561.31	P > 0.10
24800	ROI63	6	3220.59	639.22	1565.76		ROI125	5	1833.66	316.881	708.567	P > 0.10
Significantly higher in the superior region: †p < 0.05, ††p < 0.01
Significantly higher in the inferior region: *p < 0.05, **p < 0.01
